# Supplementary material
Source: PubMed Central journal article supplement (PMC55525)
Supplement: pnas_171209998_2.pdf [file pnas_171209998_2.pdf]

**Table 2. Commonly up-regulated genes in clear cell renal cell carcinoma (RCC)**

| <b>GenBank<br/>accession no.</b> | <b>Gene name</b>                                           | <b>Average fold</b> | <b>% of RCC</b> |
|----------------------------------|------------------------------------------------------------|---------------------|-----------------|
| H86554                           | Ceruloplasmin                                              | 16.9                | 96.2            |
| R00332                           | ESTs; highly similar to growth factor-responsive protein   | 14.1                | 96.4            |
| T72235                           | Nicotinamide <i>N</i> -methyltransferase                   | 13.5                | 96.6            |
| W72051                           | Fatty acid-binding protein 7, brain                        | 13.2                | 87.5            |
| W70343                           | Lysyl oxidase                                              | 11.2                | 95.8            |
| W30988                           | ESTs; highly similar to angiopoietin-related protein       | 11.1                | 100             |
| H99075                           | ESTs                                                       | 10.7                | 95.7            |
| N50654                           | Ceruloplasmin                                              | 10.6                | 95.8            |
| W93163                           | Tumor necrosis factor, $\alpha$ -induced protein 6         | 10.5                | 100             |
| T54298                           | ESTs; highly similar to angiopoietin-related protein       | 8.1                 | 100             |
| AA598601                         | Insulin-like growth factor-binding protein 3               | 7.6                 | 96.6            |
| AA678335                         | Phosphodiesterase I/ nucleotide pyrophosphatase 3          | 7.6                 | 84.0            |
| AA164819                         | ESTs                                                       | 7.1                 | 96.3            |
| AA485896                         | ESTs                                                       | 6.8                 | 96.4            |
| N26171                           | ESTs                                                       | 6.2                 | 87.5            |
| AA487787                         | von Willebrand factor                                      | 6.2                 | 100             |
| AA450189                         | Enolase 2, ( $\gamma$ , neuronal)                          | 6.0                 | 96.4            |
| R62612                           | Fibronectin 1                                              | 5.6                 | 93.1            |
| H20872                           | Fc fragment of IgG, low-affinity IIIa, receptor for (CD16) | 5.5                 | 85.7            |
| W72293                           | ESTs                                                       | 5.5                 | 93.1            |
| AA055835                         | Caveolin 1, caveolae protein 22kD                          | 5.4                 | 92.9            |
| AA873159                         | Apolipoprotein C-1                                         | 5.3                 | 88.9            |
| AA017544                         | Regulator of G-protein signaling 1                         | 5.2                 | 85.7            |
| R19956                           | Vascular endothelial growth factor                         | 5.1                 | 96.4            |
| H99816                           | Procollagen-lysine, 2-oxoglutarate 5-dioxygenase 2         | 5.1                 | 96.4            |
| R49597                           | ESTs                                                       | 4.6                 | 95.8            |
| AA405000                         | <i>Homo sapiens</i> ribonuclease 6 precursor               | 4.5                 | 96.2            |
| H58873                           | Solute carrier family 2, member 1                          | 4.5                 | 93.1            |
| T62491                           | Chemokine, receptor 4                                      | 4.4                 | 89.7            |
| AA443899                         | CD36 antigen-like 1                                        | 4.2                 | 89.3            |
| AI004331                         | Human MHC class II HLA-DQ- $\beta$                         | 4.2                 | 85.7            |
| AA488892                         | ESTs, weakly similar to Gag-Pol polyprotein                | 4.0                 | 85.7            |

Thirty-two genes or expressed sequence tags (ESTs) that are at least 3-fold up-regulated in at least 75% of RCC ( $n = 29$ ). Average fold reflect average ratios of all nonflagged spots. Percentage of RCC is the fraction of tumors that had at least 2-fold up-regulation.
