# Supplementary material
Source: PubMed Central journal article supplement (PMC55525)
Supplement: pnas_171209998_3.pdf [file pnas_171209998_3.pdf]

**Table 3. Commonly down-regulated genes in clear cell renal cell carcinoma (RCC)**

| <b>GenBank<br/>accession no.</b> | <b>Down-regulated gene</b>                                   | <b>Average fold</b> | <b>% of RCC</b> |
|----------------------------------|--------------------------------------------------------------|---------------------|-----------------|
| R89067                           | Kininogen                                                    | 27.2                | 100             |
| T53220                           | Fatty acid-binding protein 1, liver                          | 22.8                | 95.8            |
| AA682293                         | Phenylalanine hydroxylase                                    | 20.4                | 96.0            |
| AA705692                         | ESTs                                                         | 18.0                | 100             |
| AA954947                         | Epidermal growth factor ( $\beta$ -urogastone)               | 15.0                | 100             |
| H72098                           | Aldolase B, fructose-biphosphate                             | 13.6                | 100             |
| AA411988                         | ESTs                                                         | 13.3                | 100             |
| T73187                           | Plasminogen                                                  | 12.0                | 100             |
| T51617                           | Solute carrier family 22, member 3                           | 11.8                | 96.4            |
| AA777384                         | ESTs                                                         | 11.0                | 96.2            |
| H53340                           | Metallothionein 1G                                           | 10.0                | 100             |
| AA844930                         | Glycoprotein 2 (zymogen granule membrane)                    | 9.6                 | 100             |
| AA101792                         | Phosphatidylinositol glycan, class F                         | 9.4                 | 96.6            |
| AA858026                         | Protein C inhibitor (plasminogen activator inhibitor III)    | 9.4                 | 100             |
| H18950                           | ESTs, highly similar to hepatocyte nuclear factor 4 $\gamma$ | 9.2                 | 100             |
| AA405769                         | Phosphoenolpyruvate carboxykinase 1 (soluble)                | 8.9                 | 96.6            |
| AA040387                         | X-prolyl aminopeptidase 2, membrane-bound                    | 8.8                 | 96.4            |
| H77766                           | Metallothionein 1H                                           | 8.4                 | 96.6            |
| W16424                           | ESTs                                                         | 8.4                 | 92.6            |
| H88329                           | Calbindin 1 (28 kD)                                          | 8.1                 | 100             |
| N62179                           | Methylmalonate-semialdehyde dehydrogenase                    | 7.9                 | 100             |
| AA775872                         | Glypican 3                                                   | 7.9                 | 100             |
| AA457718                         | <i>Homo sapiens</i> mRNA; cDNA<br>DKEZp564B076               | 7.8                 | 95.7            |
| R24266                           | Growth factor receptor-bound protein                         | 7.1                 | 80.8            |
| R54778                           | Collagen, type XVI, $\alpha$ 1                               | 7.1                 | 100             |
| AA702640                         | Dopa decarboxylase                                           | 7.0                 | 96.3            |
| N55459                           | RNA helicase-related protein                                 | 6.9                 | 96.6            |
| AA664180                         | Glutathione peroxidase 3                                     | 6.6                 | 92.9            |
| R10382                           | Protein C inhibitor (plasminogen activator inhibitor III)    | 6.4                 | 92.6            |
| AA227594                         | Mal, T-cell differentiation protein                          | 6.3                 | 100             |
| H68509                           | UDP glycosyltransferase 2 family, polypeptide B10            | 6.1                 | 95.5            |
| AA676466                         | Argininosuccinate sythetase                                  | 6.1                 | 96.4            |

|          |                                                                              |     |      |
|----------|------------------------------------------------------------------------------|-----|------|
| H96140   | Acyl-coenzyme A dehydrogenase, short/branched chain                          | 6.0 | 96.0 |
| H11346   | Aldehyde dehydrogenase 4                                                     | 6.0 | 92.9 |
| AA862999 | Calcium-sensing receptor                                                     | 6.0 | 100  |
| AA497001 | ESTs, Weakly similar to BcDNA.GH02901                                        | 6.0 | 96.3 |
| AA449780 | EST                                                                          | 5.9 | 88.9 |
| H11369   | Aldehyde dehydrogenase 4                                                     | 5.8 | 88.9 |
| AA704995 | Putative glycine- <i>N</i> -acyltransferase                                  | 5.6 | 92.9 |
| T94781   | Potassium inwardly rectifying channel, subfamily J                           | 5.6 | 92.9 |
| N89673   | ESTs                                                                         | 5.6 | 92.6 |
| H37880   | ESTs, moderately similar to ALU SUBFAMILY SP                                 | 5.6 | 96.3 |
| AA663884 | Synaptosomal-associated protein, 25 kD                                       | 5.5 | 95.7 |
| R25818   | Aldehyde dehydrogenase 9                                                     | 5.5 | 100  |
| AA700604 | Sorbitol dehydrogenase                                                       | 5.4 | 92.6 |
| W95082   | Hydroxysteroid (11- $\beta$ ) dehydrogenase 2                                | 5.4 | 96.6 |
| AA677655 | Klotho                                                                       | 5.4 | 92.3 |
| N80129   | Metallothionein 1L                                                           | 5.3 | 86.2 |
| AA402915 | Aminoacylase 1                                                               | 5.3 | 96.3 |
| AA863424 | Dipeptidase 1 (renal)                                                        | 5.2 | 93.1 |
| H72722   | ESTs, highly similar to Metallothionein-1B                                   | 5.2 | 86.2 |
| N78083   | Glycine dehydrogenase                                                        | 5.1 | 96.4 |
| R06601   | ESTs, moderately similar to Metallothionein-II                               | 5.1 | 82.8 |
| AA131240 | ESTs                                                                         | 5.0 | 92.0 |
| AA485965 | Succinate-CoA ligase, GDP-forming, $\alpha$ subunit                          | 4.9 | 92.9 |
| AA196287 | ESTs, weakly similar to alternative spliced product using exon 13A           | 4.9 | 96.6 |
| R61229   | Glycine amidinotransferase (L-arginine: glycine amidinotransferase)          | 4.8 | 82.8 |
| AA872383 | Metallothionein 1E (functional)                                              | 4.8 | 82.8 |
| N23898   | G protein-coupled receptor kinase 2 ( <i>Drosophila</i> )-like               | 4.8 | 92.9 |
| AA699427 | Fructose-biphosphatase 1                                                     | 4.7 | 93.1 |
| T68892   | Secreted frizzled-related protein 1                                          | 4.7 | 96.2 |
| AA873355 | ATPase, Na <sup>+</sup> /K <sup>+</sup> transporting, $\alpha$ 1 polypeptide | 4.7 | 100  |
| AI000188 | UDP glycosyltransferase 2 family, polypeptide B7                             | 4.6 | 85.7 |
| AA459197 | Sodium channel, nonvoltage-gated 1 $\alpha$                                  | 4.6 | 89.7 |
| AA460298 | Methylmalonate-semialdehyde dehydrogenase                                    | 4.4 | 91.7 |
| W86431   | Protein C inhibitor (plasminogen activator inhibitor III)                    | 4.4 | 100  |

|          |                                                                   |     |      |
|----------|-------------------------------------------------------------------|-----|------|
| T65482   | L-3-hydroxyacyl-coenzyme A dehydrogenase,<br>short chain          | 4.4 | 96.2 |
| AA457374 | DKFZP586B0319                                                     | 4.3 | 91.7 |
| R33037   | ESTs                                                              | 4.3 | 92.0 |
| AA437099 | ESTs                                                              | 4.3 | 85.2 |
| W01011   | SA (rat hypertension-associated) homolog                          | 4.2 | 89.7 |
| R16596   | EST, moderately similar to Cd-7<br>metallothionein-2              | 4.1 | 86.2 |
| AA863449 | Oviductal glycoprotein 1, 120 kD                                  | 4.0 | 92.9 |
| N53031   | UDP glycosyltransferase 2 family,<br>polypeptide B4               | 4.0 | 86.2 |
| AA458884 | S100 calcium-binding protein A2                                   | 4.0 | 92.9 |
| AA608575 | Propionyl coenzyme A carboxylase, $\alpha$<br>polypeptide         | 3.8 | 89.7 |
| H18608   | Solute carrier family 22 (organic anion<br>transporter), member 8 | 3.6 | 89.3 |

---

Seventy-seven genes or expressed sequence tags (ESTs) that are at least 3-fold down-regulated in at least 75% of RCC ( $n = 29$ ). Average fold reflect average ratios of all nonflagged spots. Percentage of RCC is the fraction of tumors that had at least 2-fold down-regulation.
